# Supplementary material for: Myocardial T2* Imaging at 3T and 1.5T: A Pilot Study with Phantom and Normal Myocardium
Source: MDPI journal article supplement (doi:10.3390/jcdd9080271), 2022-08-16
Supplement: s1 [file s1]

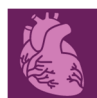

## Supplementary Tables

**Table S1.** T2\* mapping scan parameters

| Scanner | Institution | Field strength | Manufacturer | Model name      | Flip angle (degree) | FOV     | Slice Thickness (mm) | Pixel spacing (mm <sup>2</sup> ) | Matrix size |
|---------|-------------|----------------|--------------|-----------------|---------------------|---------|----------------------|----------------------------------|-------------|
| MR-A1   | A           | 1.5T           | Philips      | Achieva dStream | 20                  | 300*300 | 10                   | 1.34*1.34                        | 224*224     |
| MR-A2   | A           | 3.0T           | Philips      | Ingenia CX      | 25                  | 300*300 | 8                    | 1.34*1.34                        | 224*224     |
| MR-A3   | A           | 3.0T           | Siemens      | Prisma Fit      | 15                  | 300*196 | 8                    | 1.17*1.17                        | 256*168     |
| MR-B    | B           | 3.0T           | Siemens      | Verio           | 12                  | 380*332 | 10                   | 1.17*1.17                        | 256*176     |

FOV: field of view.

---

**Table S2.** Repetition time (TR) and echo time (TE)

| Scanner | TR (ms) | TE (1) | TE (2) | TE (3) | TE (4) | TE (5) | TE (6) | TE (7) | TE (8) |
|---------|---------|--------|--------|--------|--------|--------|--------|--------|--------|
| MR-A1   | 14.6    | 1.2    | 3.2    | 5.2    | 7.2    | 9.3    | 11.3   | 13.3   | -      |
| MR-A2   | 14.4    | 1.1    | 2.8    | 4.6    | 6.3    | 8      | 9.7    | 11.5   | 13.2   |
| MR-A3   | 20      | 1.9    | 4.4    | 6.9    | 9.5    | 12     | 14.6   | -      | -      |
| MR-B    | 20      | 2.5    | 4.8    | 7.2    | 9.5    | 11.8   | 14.1   | 16.4   | 18.8   |

TE: echo time; TR: repetition time.
